# Supplementary material for: Navigating oxygen deprivation: liver transcriptomic responses of the red eared slider turtle to environmental anoxia
Source: PeerJ. 2019 Nov 26;7:e8144. doi: 10.7717/peerj.8144 (PMC6883951; doi:10.7717/peerj.8144)
Supplement: Table S2 [file peerj-07-8144-s003.xlsx]

## Sheet: disdn
Supplementary Table S2
rank	p_value	GS	p_class
13.5	0.0025	ACTIN_CYTOSKELETON_ORGANIZATION_AND_BIOGENESIS	disdn
1	0	ACTIN_FILAMENT_BASED_PROCESS	disdn
86.5	0.0625	AGING	disdn
7	0.001	AMINE_BIOSYNTHETIC_PROCESS	disdn
616	0.859	AMINE_CATABOLIC_PROCESS	disdn
181.5	0.179	AMINE_METABOLIC_PROCESS	disdn
317.5	0.4135	AMINO_ACID_AND_DERIVATIVE_METABOLIC_PROCESS	disdn
618	0.858	AMINO_ACID_CATABOLIC_PROCESS	disdn
609	0.848	AMINO_ACID_DERIVATIVE_METABOLIC_PROCESS	disdn
174.5	0.1755	AMINO_ACID_METABOLIC_PROCESS	disdn
718	0.956	AMINO_ACID_TRANSPORT	disdn
1	0	ANATOMICAL_STRUCTURE_DEVELOPMENT	disdn
159	0.167	ANATOMICAL_STRUCTURE_FORMATION	disdn
269	0.385	ANGIOGENESIS	disdn
333.5	0.427	AROMATIC_COMPOUND_METABOLIC_PROCESS	disdn
154.5	0.1375	BEHAVIOR	disdn
802	1	BIOPOLYMER_METABOLIC_PROCESS	disdn
42	0.023	BLOOD_COAGULATION	disdn
475.5	0.664	CARBOXYLIC_ACID_METABOLIC_PROCESS	disdn
52	0.0285	CATION_TRANSPORT	disdn
53	0.029	CELL_CELL_SIGNALING	disdn
40.5	0.022	CELL_SUBSTRATE_ADHESION	disdn
775.5	0.991	CELLULAR_COMPONENT_ASSEMBLY	disdn
530.5	0.777	CELLULAR_LIPID_CATABOLIC_PROCESS	disdn
12.5	0.00116755	CENTRAL_NERVOUS_SYSTEM_DEVELOPMENT	disdn
42	0.023	COAGULATION	disdn
39	0.021	CYTOKINE_BIOSYNTHETIC_PROCESS	disdn
33.5	0.0155	CYTOKINE_METABOLIC_PROCESS	disdn
795	0.998	CYTOKINE_SECRETION	disdn
22	0.0095	CYTOSKELETON_ORGANIZATION_AND_BIOGENESIS	disdn
17.5	0.0055	DEFENSE_RESPONSE_TO_BACTERIUM	disdn
115.5	0.088	DIGESTION	disdn
60.5	0.037	ECTODERM_DEVELOPMENT	disdn
263.5	0.3705	EMBRYONIC_DEVELOPMENT	disdn
23.5	0.0095	EPIDERMIS_DEVELOPMENT	disdn
775.5	0.989	ESTABLISHMENT_AND_OR_MAINTENANCE_OF_CHROMATIN_ARCHITECTURE	disdn
8.5	0.002	EXTRACELLULAR_STRUCTURE_ORGANIZATION_AND_BIOGENESIS	disdn
786.5	0.997	FATTY_ACID_BETA_OXIDATION	disdn
701.5	0.934	FATTY_ACID_METABOLIC_PROCESS	disdn
798	0.998	FATTY_ACID_OXIDATION	disdn
47	0.026	FEMALE_GAMETE_GENERATION	disdn
72	0.048	FEMALE_PREGNANCY	disdn
789	0.995	G2_M_TRANSITION_OF_MITOTIC_CELL_CYCLE	disdn
41	0.0225	GENERATION_OF_NEURONS	disdn
594.5	0.851	GLYCOPROTEIN_CATABOLIC_PROCESS	disdn
170	0.167	HEART_DEVELOPMENT	disdn
87.5	0.0655	HEMOSTASIS	disdn
634.5	0.878	HETEROPHILIC_CELL_ADHESION	disdn
30.5	0.01	HORMONE_SECRETION	disdn
66	0.0417285	ION_TRANSPORT	disdn
131.5	0.1095	LEUKOCYTE_CHEMOTAXIS	disdn
610.5	0.879	LIPID_CATABOLIC_PROCESS	disdn
624.5	0.88	LIPID_HOMEOSTASIS	disdn
778.5	0.992	MACROMOLECULAR_COMPLEX_ASSEMBLY	disdn
789	0.994	MACROMOLECULE_BIOSYNTHETIC_PROCESS	disdn
350	0.449	MEIOTIC_CELL_CYCLE	disdn
78	0.065	METAL_ION_TRANSPORT	disdn
776.5	0.991	MICROTUBULE_CYTOSKELETON_ORGANIZATION_AND_BIOGENESIS	disdn
739.5	0.968	MITOTIC_SPINDLE_ORGANIZATION_AND_BIOGENESIS	disdn
526	0.764	MONOCARBOXYLIC_ACID_METABOLIC_PROCESS	disdn
125	0.1005	MONOVALENT_INORGANIC_CATION_TRANSPORT	disdn
802	1	MRNA_METABOLIC_PROCESS	disdn
802	1	MRNA_PROCESSING_GO_0006397	disdn
1	0	MULTICELLULAR_ORGANISMAL_DEVELOPMENT	disdn
39	0.021	MUSCLE_DEVELOPMENT	disdn
77.5	0.0445	MYELOID_LEUKOCYTE_DIFFERENTIATION	disdn
33	0.017	NEGATIVE_REGULATION_OF_ANGIOGENESIS	disdn
468	0.611	NEGATIVE_REGULATION_OF_BIOLOGICAL_PROCESS	disdn
36.5	0.015	NEGATIVE_REGULATION_OF_CELL_DIFFERENTIATION	disdn
270.5	0.329	NEGATIVE_REGULATION_OF_CELL_MIGRATION	disdn
15.5	0.0025	NEGATIVE_REGULATION_OF_IMMUNE_SYSTEM_PROCESS	disdn
773.5	0.988	NEGATIVE_REGULATION_OF_METABOLIC_PROCESS	disdn
58.5	0.0339745	NEGATIVE_REGULATION_OF_MULTICELLULAR_ORGANISMAL_PROCESS	disdn
788	0.997	NEGATIVE_REGULATION_OF_NUCLEOBASENUCLEOSIDENUCLEOTIDE_AND_NUCLEIC_ACID_METABOLIC_PROCESS	disdn
114.5	0.087	NEGATIVE_REGULATION_OF_PHOSPHATE_METABOLIC_PROCESS	disdn
143	0.1265	NEGATIVE_REGULATION_OF_PHOSPHORYLATION	disdn
482.5	0.695	NEGATIVE_REGULATION_OF_SECRETION	disdn
32.5	0.0155	NERVOUS_SYSTEM_DEVELOPMENT	disdn
52	0.03	NEUROLOGICAL_SYSTEM_PROCESS	disdn
40.5	0.022	NEURON_DEVELOPMENT	disdn
41	0.020142	NEURON_DIFFERENTIATION	disdn
31.5	0.0155	NITROGEN_COMPOUND_BIOSYNTHETIC_PROCESS	disdn
734	0.974	NITROGEN_COMPOUND_CATABOLIC_PROCESS	disdn
258.5	0.301	NITROGEN_COMPOUND_METABOLIC_PROCESS	disdn
802	1	NUCLEOBASENUCLEOSIDENUCLEOTIDE_AND_NUCLEIC_ACID_METABOLIC_PROCESS	disdn
772	0.989	NUCLEOTIDE_EXCISION_REPAIR	disdn
783	0.992	ONE_CARBON_COMPOUND_METABOLIC_PROCESS	disdn
11.5	0.0015	ORGAN_DEVELOPMENT	disdn
537.5	0.745	ORGANIC_ACID_METABOLIC_PROCESS	disdn
34	0.0175	PHOSPHOINOSITIDE_MEDIATED_SIGNALING	disdn
785	0.996	POSITIVE_REGULATION_OF_ANGIOGENESIS	disdn
792	0.996	POSITIVE_REGULATION_OF_BIOLOGICAL_PROCESS	disdn
259	0.3035	POSITIVE_REGULATION_OF_CELL_CYCLE	disdn
610	0.864	POSITIVE_REGULATION_OF_CELL_MIGRATION	disdn
781.5	0.995	POSITIVE_REGULATION_OF_MAPKKK_CASCADE	disdn
124.5	0.104	POSITIVE_REGULATION_OF_SECRETION	disdn
183.5	0.230815	POTASSIUM_ION_TRANSPORT	disdn
36.5	0.019	PROTEIN_FOLDING	disdn
801.5	1	PROTEIN_RNA_COMPLEX_ASSEMBLY	disdn
23.5	0.01	PROTEIN_TARGETING_TO_MEMBRANE	disdn
696	0.937	REGULATION_OF_ACTION_POTENTIAL	disdn
128.5	0.111	REGULATION_OF_AXONOGENESIS	disdn
309	0.37	REGULATION_OF_BLOOD_PRESSURE	disdn
81.5	0.059	REGULATION_OF_BODY_FLUID_LEVELS	disdn
44.5	0.023	REGULATION_OF_CELL_DIFFERENTIATION	disdn
802	1	REGULATION_OF_CELLULAR_METABOLIC_PROCESS	disdn
780.5	0.992	REGULATION_OF_CHROMOSOME_ORGANIZATION_AND_BIOGENESIS	disdn
791	0.996	REGULATION_OF_CYCLIN_DEPENDENT_PROTEIN_KINASE_ACTIVITY	disdn
38.5	0.021	REGULATION_OF_CYTOKINE_BIOSYNTHETIC_PROCESS	disdn
767	0.989	REGULATION_OF_CYTOKINE_SECRETION	disdn
802	1	REGULATION_OF_GENE_EXPRESSION	disdn
798.5	0.999	REGULATION_OF_GENE_EXPRESSION_EPIGENETIC	disdn
281	0.324	REGULATION_OF_HEART_CONTRACTION	disdn
32.5	0.0140055	REGULATION_OF_INTERFERON_GAMMA_BIOSYNTHETIC_PROCESS	disdn
783	0.992	REGULATION_OF_LIPID_METABOLIC_PROCESS	disdn
802	1	REGULATION_OF_METABOLIC_PROCESS	disdn
330.5	0.396	REGULATION_OF_MULTICELLULAR_ORGANISMAL_PROCESS	disdn
77.5	0.0575	REGULATION_OF_NEUROGENESIS	disdn
802	1	REGULATION_OF_NUCLEOBASENUCLEOSIDENUCLEOTIDE_AND_NUCLEIC_ACID_METABOLIC_PROCESS	disdn
801.5	1	REGULATION_OF_RNA_METABOLIC_PROCESS	disdn
802	1	REGULATION_OF_TRANSCRIPTION	disdn
800	0.999	REGULATION_OF_TRANSCRIPTION_FROM_RNA_POLYMERASE_II_PROMOTER	disdn
802	1	REGULATION_OF_TRANSCRIPTIONDNA_DEPENDENT	disdn
11	0.0015	RESPONSE_TO_BACTERIUM	disdn
19	0.0065	RESPONSE_TO_BIOTIC_STIMULUS	disdn
7.5	0.001	RESPONSE_TO_EXTERNAL_STIMULUS	disdn
4.5	0.0005	RESPONSE_TO_WOUNDING	disdn
498.5	0.705	RHYTHMIC_PROCESS	disdn
802	1	RIBONUCLEOPROTEIN_COMPLEX_BIOGENESIS_AND_ASSEMBLY	disdn
792	0.997	RIBOSOME_BIOGENESIS_AND_ASSEMBLY	disdn
792	0.995	RNA_3END_PROCESSING	disdn
801.5	1	RNA_BIOSYNTHETIC_PROCESS	disdn
802	1	RNA_METABOLIC_PROCESS	disdn
802	1	RNA_PROCESSING	disdn
802	1	RNA_SPLICING	disdn
800	1	RNA_SPLICINGVIA_TRANSESTERIFICATION_REACTIONS	disdn
784	0.993	RRNA_METABOLIC_PROCESS	disdn
26.5	0.0095	SENSORY_ORGAN_DEVELOPMENT	disdn
1	0	SKELETAL_DEVELOPMENT	disdn
25	0.01	SKELETAL_MUSCLE_DEVELOPMENT	disdn
710.5	0.945	SPHINGOID_METABOLIC_PROCESS	disdn
739.5	0.968	SPINDLE_ORGANIZATION_AND_BIOGENESIS	disdn
44	0.0205	STRIATED_MUSCLE_DEVELOPMENT	disdn
41	0.023	SYNAPSE_ORGANIZATION_AND_BIOGENESIS	disdn
9.5	0.0015	SYNAPTIC_TRANSMISSION	disdn
1	0	SYSTEM_DEVELOPMENT	disdn
15	0.0035	SYSTEM_PROCESS	disdn
43	0.024	TISSUE_DEVELOPMENT	disdn
30	0.011	TISSUE_MORPHOGENESIS	disdn
802	1	TRANSCRIPTION	disdn
802	1	TRANSCRIPTION_DNA_DEPENDENT	disdn
801.5	1	TRANSCRIPTION_FROM_RNA_POLYMERASE_II_PROMOTER	disdn
801.5	1	TRANSLATION	disdn
771.5	0.986	TRANSLATIONAL_INITIATION	disdn
32.5	0.016	TRANSMISSION_OF_NERVE_IMPULSE	disdn
403.5	0.606	VASCULATURE_DEVELOPMENT	disdn
15	0.004	WOUND_HEALING	disdn

## Sheet: mixup
rank	p_value	GS	p_class
250	0.207	ACTIN_CYTOSKELETON_ORGANIZATION_AND_BIOGENESIS	mixup
453	0.455	ACTIN_FILAMENT_BASED_PROCESS	mixup
207	0.148	AGING	mixup
572	0.642	AMINE_BIOSYNTHETIC_PROCESS	mixup
38	0.009	AMINE_CATABOLIC_PROCESS	mixup
67	0.018	AMINE_METABOLIC_PROCESS	mixup
8	0.001	AMINO_ACID_AND_DERIVATIVE_METABOLIC_PROCESS	mixup
51	0.015	AMINO_ACID_CATABOLIC_PROCESS	mixup
41	0.008	AMINO_ACID_DERIVATIVE_METABOLIC_PROCESS	mixup
67	0.019	AMINO_ACID_METABOLIC_PROCESS	mixup
27	0.004	AMINO_ACID_TRANSPORT	mixup
33	0.007	ANATOMICAL_STRUCTURE_DEVELOPMENT	mixup
33	0.009	ANATOMICAL_STRUCTURE_FORMATION	mixup
38	0.009	ANGIOGENESIS	mixup
711	0.836	AROMATIC_COMPOUND_METABOLIC_PROCESS	mixup
123	0.074	BEHAVIOR	mixup
388	0.364	BIOPOLYMER_METABOLIC_PROCESS	mixup
427	0.422	BLOOD_COAGULATION	mixup
8	0.001	CARBOXYLIC_ACID_METABOLIC_PROCESS	mixup
17	0.002	CATION_TRANSPORT	mixup
109	0.054	CELL_CELL_SIGNALING	mixup
217	0.165	CELL_SUBSTRATE_ADHESION	mixup
266	0.227	CELLULAR_COMPONENT_ASSEMBLY	mixup
46	0.011	CELLULAR_LIPID_CATABOLIC_PROCESS	mixup
312	0.293	CENTRAL_NERVOUS_SYSTEM_DEVELOPMENT	mixup
427	0.422	COAGULATION	mixup
643	0.744	CYTOKINE_BIOSYNTHETIC_PROCESS	mixup
643	0.744	CYTOKINE_METABOLIC_PROCESS	mixup
1	0	CYTOKINE_SECRETION	mixup
283	0.244	CYTOSKELETON_ORGANIZATION_AND_BIOGENESIS	mixup
463	0.472	DEFENSE_RESPONSE_TO_BACTERIUM	mixup
259	0.22	DIGESTION	mixup
323	0.296	ECTODERM_DEVELOPMENT	mixup
7	0.001	EMBRYONIC_DEVELOPMENT	mixup
211	0.156	EPIDERMIS_DEVELOPMENT	mixup
545	0.591	ESTABLISHMENT_AND_OR_MAINTENANCE_OF_CHROMATIN_ARCHITECTURE	mixup
769	0.91	EXTRACELLULAR_STRUCTURE_ORGANIZATION_AND_BIOGENESIS	mixup
1	0	FATTY_ACID_BETA_OXIDATION	mixup
7	0.001	FATTY_ACID_METABOLIC_PROCESS	mixup
8	0.001	FATTY_ACID_OXIDATION	mixup
524	0.564	FEMALE_GAMETE_GENERATION	mixup
732	0.859	FEMALE_PREGNANCY	mixup
79	0.027	G2_M_TRANSITION_OF_MITOTIC_CELL_CYCLE	mixup
487	0.517	GENERATION_OF_NEURONS	mixup
38	0.009	GLYCOPROTEIN_CATABOLIC_PROCESS	mixup
7	0.001	HEART_DEVELOPMENT	mixup
326	0.3	HEMOSTASIS	mixup
36	0.008	HETEROPHILIC_CELL_ADHESION	mixup
803	0.97	HORMONE_SECRETION	mixup
10	0.001	ION_TRANSPORT	mixup
502	0.541	LEUKOCYTE_CHEMOTAXIS	mixup
24	0.004	LIPID_CATABOLIC_PROCESS	mixup
12	0.001	LIPID_HOMEOSTASIS	mixup
301	0.267	MACROMOLECULAR_COMPLEX_ASSEMBLY	mixup
726	0.853	MACROMOLECULE_BIOSYNTHETIC_PROCESS	mixup
54	0.014	MEIOTIC_CELL_CYCLE	mixup
41	0.009	METAL_ION_TRANSPORT	mixup
77	0.032	MICROTUBULE_CYTOSKELETON_ORGANIZATION_AND_BIOGENESIS	mixup
47	0.01	MITOTIC_SPINDLE_ORGANIZATION_AND_BIOGENESIS	mixup
44	0.01	MONOCARBOXYLIC_ACID_METABOLIC_PROCESS	mixup
7	0.001	MONOVALENT_INORGANIC_CATION_TRANSPORT	mixup
89	0.043	MRNA_METABOLIC_PROCESS	mixup
22	0.003	MRNA_PROCESSING_GO_0006397	mixup
10	0.001	MULTICELLULAR_ORGANISMAL_DEVELOPMENT	mixup
382	0.369	MUSCLE_DEVELOPMENT	mixup
567	0.63	MYELOID_LEUKOCYTE_DIFFERENTIATION	mixup
748	0.882	NEGATIVE_REGULATION_OF_ANGIOGENESIS	mixup
238	0.194	NEGATIVE_REGULATION_OF_BIOLOGICAL_PROCESS	mixup
156	0.102	NEGATIVE_REGULATION_OF_CELL_DIFFERENTIATION	mixup
423	0.419	NEGATIVE_REGULATION_OF_CELL_MIGRATION	mixup
342	0.311	NEGATIVE_REGULATION_OF_IMMUNE_SYSTEM_PROCESS	mixup
464	0.479	NEGATIVE_REGULATION_OF_METABOLIC_PROCESS	mixup
127	0.068	NEGATIVE_REGULATION_OF_MULTICELLULAR_ORGANISMAL_PROCESS	mixup
449	0.457	NEGATIVE_REGULATION_OF_NUCLEOBASENUCLEOSIDENUCLEOTIDE_AND_NUCLEIC_ACID_METABOLIC_PROCESS	mixup
152	0.105	NEGATIVE_REGULATION_OF_PHOSPHATE_METABOLIC_PROCESS	mixup
152	0.105	NEGATIVE_REGULATION_OF_PHOSPHORYLATION	mixup
36	0.009	NEGATIVE_REGULATION_OF_SECRETION	mixup
106	0.053	NERVOUS_SYSTEM_DEVELOPMENT	mixup
22	0.003	NEUROLOGICAL_SYSTEM_PROCESS	mixup
612	0.707	NEURON_DEVELOPMENT	mixup
468	0.484	NEURON_DIFFERENTIATION	mixup
546	0.588	NITROGEN_COMPOUND_BIOSYNTHETIC_PROCESS	mixup
12	0.001	NITROGEN_COMPOUND_CATABOLIC_PROCESS	mixup
41	0.008	NITROGEN_COMPOUND_METABOLIC_PROCESS	mixup
231	0.174	NUCLEOBASENUCLEOSIDENUCLEOTIDE_AND_NUCLEIC_ACID_METABOLIC_PROCESS	mixup
491	0.526	NUCLEOTIDE_EXCISION_REPAIR	mixup
114	0.058	ONE_CARBON_COMPOUND_METABOLIC_PROCESS	mixup
59	0.017	ORGAN_DEVELOPMENT	mixup
1	0	ORGANIC_ACID_METABOLIC_PROCESS	mixup
314	0.298	PHOSPHOINOSITIDE_MEDIATED_SIGNALING	mixup
37	0.008	POSITIVE_REGULATION_OF_ANGIOGENESIS	mixup
422	0.415	POSITIVE_REGULATION_OF_BIOLOGICAL_PROCESS	mixup
428	0.423	POSITIVE_REGULATION_OF_CELL_CYCLE	mixup
40	0.009	POSITIVE_REGULATION_OF_CELL_MIGRATION	mixup
275	0.237	POSITIVE_REGULATION_OF_MAPKKK_CASCADE	mixup
403	0.388	POSITIVE_REGULATION_OF_SECRETION	mixup
21	0.003	POTASSIUM_ION_TRANSPORT	mixup
690	0.81	PROTEIN_FOLDING	mixup
228	0.196	PROTEIN_RNA_COMPLEX_ASSEMBLY	mixup
514	0.55	PROTEIN_TARGETING_TO_MEMBRANE	mixup
7	0.001	REGULATION_OF_ACTION_POTENTIAL	mixup
264	0.219	REGULATION_OF_AXONOGENESIS	mixup
114	0.058	REGULATION_OF_BLOOD_PRESSURE	mixup
235	0.188	REGULATION_OF_BODY_FLUID_LEVELS	mixup
399	0.382	REGULATION_OF_CELL_DIFFERENTIATION	mixup
497	0.535	REGULATION_OF_CELLULAR_METABOLIC_PROCESS	mixup
328	0.311	REGULATION_OF_CHROMOSOME_ORGANIZATION_AND_BIOGENESIS	mixup
495	0.525	REGULATION_OF_CYCLIN_DEPENDENT_PROTEIN_KINASE_ACTIVITY	mixup
685	0.807	REGULATION_OF_CYTOKINE_BIOSYNTHETIC_PROCESS	mixup
8	0.001	REGULATION_OF_CYTOKINE_SECRETION	mixup
310	0.284	REGULATION_OF_GENE_EXPRESSION	mixup
84	0.037	REGULATION_OF_GENE_EXPRESSION_EPIGENETIC	mixup
30	0.005	REGULATION_OF_HEART_CONTRACTION	mixup
776	0.925	REGULATION_OF_INTERFERON_GAMMA_BIOSYNTHETIC_PROCESS	mixup
67	0.023	REGULATION_OF_LIPID_METABOLIC_PROCESS	mixup
367	0.353	REGULATION_OF_METABOLIC_PROCESS	mixup
34	0.006	REGULATION_OF_MULTICELLULAR_ORGANISMAL_PROCESS	mixup
207	0.154	REGULATION_OF_NEUROGENESIS	mixup
490	0.525	REGULATION_OF_NUCLEOBASENUCLEOSIDENUCLEOTIDE_AND_NUCLEIC_ACID_METABOLIC_PROCESS	mixup
510	0.554	REGULATION_OF_RNA_METABOLIC_PROCESS	mixup
413	0.396	REGULATION_OF_TRANSCRIPTION	mixup
433	0.427	REGULATION_OF_TRANSCRIPTION_FROM_RNA_POLYMERASE_II_PROMOTER	mixup
477	0.504	REGULATION_OF_TRANSCRIPTIONDNA_DEPENDENT	mixup
463	0.472	RESPONSE_TO_BACTERIUM	mixup
210	0.162	RESPONSE_TO_BIOTIC_STIMULUS	mixup
367	0.354	RESPONSE_TO_EXTERNAL_STIMULUS	mixup
356	0.339	RESPONSE_TO_WOUNDING	mixup
24	0.004	RHYTHMIC_PROCESS	mixup
368	0.357	RIBONUCLEOPROTEIN_COMPLEX_BIOGENESIS_AND_ASSEMBLY	mixup
248	0.203	RIBOSOME_BIOGENESIS_AND_ASSEMBLY	mixup
27	0.004	RNA_3END_PROCESSING	mixup
665	0.775	RNA_BIOSYNTHETIC_PROCESS	mixup
205	0.15	RNA_METABOLIC_PROCESS	mixup
1	0	RNA_PROCESSING	mixup
24	0.005	RNA_SPLICING	mixup
455	0.459	RNA_SPLICINGVIA_TRANSESTERIFICATION_REACTIONS	mixup
458	0.495	RRNA_METABOLIC_PROCESS	mixup
795	0.959	SENSORY_ORGAN_DEVELOPMENT	mixup
51	0.012	SKELETAL_DEVELOPMENT	mixup
651	0.751	SKELETAL_MUSCLE_DEVELOPMENT	mixup
41	0.01	SPHINGOID_METABOLIC_PROCESS	mixup
47	0.01	SPINDLE_ORGANIZATION_AND_BIOGENESIS	mixup
590	0.661	STRIATED_MUSCLE_DEVELOPMENT	mixup
736	0.866	SYNAPSE_ORGANIZATION_AND_BIOGENESIS	mixup
104	0.054	SYNAPTIC_TRANSMISSION	mixup
18	0.002	SYSTEM_DEVELOPMENT	mixup
8	0.001	SYSTEM_PROCESS	mixup
262	0.22	TISSUE_DEVELOPMENT	mixup
425	0.417	TISSUE_MORPHOGENESIS	mixup
550	0.598	TRANSCRIPTION	mixup
619	0.708	TRANSCRIPTION_DNA_DEPENDENT	mixup
630	0.726	TRANSCRIPTION_FROM_RNA_POLYMERASE_II_PROMOTER	mixup
577	0.643	TRANSLATION	mixup
232	0.182	TRANSLATIONAL_INITIATION	mixup
28	0.006	TRANSMISSION_OF_NERVE_IMPULSE	mixup
24	0.003	VASCULATURE_DEVELOPMENT	mixup
475	0.495	WOUND_HEALING	mixup

## Sheet: disup
rank	p_value	GS	p_class
809.5	0.998	ACTIN_CYTOSKELETON_ORGANIZATION_AND_BIOGENESIS	disup
816	1	ACTIN_FILAMENT_BASED_PROCESS	disup
724.5	0.93	AGING	disup
816.5	1	AMINE_BIOSYNTHETIC_PROCESS	disup
173.5	0.1505	AMINE_CATABOLIC_PROCESS	disup
623	0.818	AMINE_METABOLIC_PROCESS	disup
490	0.579	AMINO_ACID_AND_DERIVATIVE_METABOLIC_PROCESS	disup
174.5	0.145	AMINO_ACID_CATABOLIC_PROCESS	disup
200	0.1535	AMINO_ACID_DERIVATIVE_METABOLIC_PROCESS	disup
642.5	0.816	AMINO_ACID_METABOLIC_PROCESS	disup
93	0.0530735	AMINO_ACID_TRANSPORT	disup
813.5	1	ANATOMICAL_STRUCTURE_DEVELOPMENT	disup
652	0.841	ANATOMICAL_STRUCTURE_FORMATION	disup
522.5	0.626	ANGIOGENESIS	disup
484.5	0.581	AROMATIC_COMPOUND_METABOLIC_PROCESS	disup
669.5	0.862	BEHAVIOR	disup
1	0	BIOPOLYMER_METABOLIC_PROCESS	disup
776	0.974	BLOOD_COAGULATION	disup
340	0.333	CARBOXYLIC_ACID_METABOLIC_PROCESS	disup
771	0.971	CATION_TRANSPORT	disup
768.5	0.969	CELL_CELL_SIGNALING	disup
773.5	0.974	CELL_SUBSTRATE_ADHESION	disup
49.5	0.0135	CELLULAR_COMPONENT_ASSEMBLY	disup
250.5	0.2195	CELLULAR_LIPID_CATABOLIC_PROCESS	disup
810	0.999	CENTRAL_NERVOUS_SYSTEM_DEVELOPMENT	disup
776	0.974	COAGULATION	disup
787	0.987	CYTOKINE_BIOSYNTHETIC_PROCESS	disup
791.5	0.985	CYTOKINE_METABOLIC_PROCESS	disup
25.5	0.0015	CYTOKINE_SECRETION	disup
801.5	0.994	CYTOSKELETON_ORGANIZATION_AND_BIOGENESIS	disup
803	0.996	DEFENSE_RESPONSE_TO_BACTERIUM	disup
707	0.895	DIGESTION	disup
754.5	0.956	ECTODERM_DEVELOPMENT	disup
520	0.645	EMBRYONIC_DEVELOPMENT	disup
794.5	0.989	EPIDERMIS_DEVELOPMENT	disup
49	0.014	ESTABLISHMENT_AND_OR_MAINTENANCE_OF_CHROMATIN_ARCHITECTURE	disup
808	0.996	EXTRACELLULAR_STRUCTURE_ORGANIZATION_AND_BIOGENESIS	disup
28.5	0.004	FATTY_ACID_BETA_OXIDATION	disup
115.5	0.061	FATTY_ACID_METABOLIC_PROCESS	disup
24	0.002	FATTY_ACID_OXIDATION	disup
776	0.975	FEMALE_GAMETE_GENERATION	disup
737	0.946	FEMALE_PREGNANCY	disup
27.5	0.0025	G2_M_TRANSITION_OF_MITOTIC_CELL_CYCLE	disup
779	0.976	GENERATION_OF_NEURONS	disup
203.5	0.14351	GLYCOPROTEIN_CATABOLIC_PROCESS	disup
597.5	0.766	HEART_DEVELOPMENT	disup
727.5	0.928	HEMOSTASIS	disup
174.5	0.127	HETEROPHILIC_CELL_ADHESION	disup
797	0.99	HORMONE_SECRETION	disup
751	0.956	ION_TRANSPORT	disup
680	0.888	LEUKOCYTE_CHEMOTAXIS	disup
175	0.125205	LIPID_CATABOLIC_PROCESS	disup
166	0.11688	LIPID_HOMEOSTASIS	disup
44.5	0.0115	MACROMOLECULAR_COMPLEX_ASSEMBLY	disup
34.5	0.006	MACROMOLECULE_BIOSYNTHETIC_PROCESS	disup
450.5	0.549	MEIOTIC_CELL_CYCLE	disup
736.5	0.932	METAL_ION_TRANSPORT	disup
40	0.011	MICROTUBULE_CYTOSKELETON_ORGANIZATION_AND_BIOGENESIS	disup
76.5	0.033196	MITOTIC_SPINDLE_ORGANIZATION_AND_BIOGENESIS	disup
274	0.232	MONOCARBOXYLIC_ACID_METABOLIC_PROCESS	disup
696	0.901	MONOVALENT_INORGANIC_CATION_TRANSPORT	disup
1	0	MRNA_METABOLIC_PROCESS	disup
1	0	MRNA_PROCESSING_GO_0006397	disup
816	1	MULTICELLULAR_ORGANISMAL_DEVELOPMENT	disup
781	0.977	MUSCLE_DEVELOPMENT	disup
732.5	0.952	MYELOID_LEUKOCYTE_DIFFERENTIATION	disup
791	0.981	NEGATIVE_REGULATION_OF_ANGIOGENESIS	disup
357	0.379	NEGATIVE_REGULATION_OF_BIOLOGICAL_PROCESS	disup
787	0.986	NEGATIVE_REGULATION_OF_CELL_DIFFERENTIATION	disup
550	0.679	NEGATIVE_REGULATION_OF_CELL_MIGRATION	disup
805.5	0.998	NEGATIVE_REGULATION_OF_IMMUNE_SYSTEM_PROCESS	disup
48.5	0.012	NEGATIVE_REGULATION_OF_METABOLIC_PROCESS	disup
763.5	0.964	NEGATIVE_REGULATION_OF_MULTICELLULAR_ORGANISMAL_PROCESS	disup
34.5	0.005	NEGATIVE_REGULATION_OF_NUCLEOBASENUCLEOSIDENUCLEOTIDE_AND_NUCLEIC_ACID_METABOLIC_PROCESS	disup
692.5	0.912	NEGATIVE_REGULATION_OF_PHOSPHATE_METABOLIC_PROCESS	disup
674	0.88	NEGATIVE_REGULATION_OF_PHOSPHORYLATION	disup
322	0.298	NEGATIVE_REGULATION_OF_SECRETION	disup
791	0.984	NERVOUS_SYSTEM_DEVELOPMENT	disup
770.5	0.969	NEUROLOGICAL_SYSTEM_PROCESS	disup
777	0.977	NEURON_DEVELOPMENT	disup
778.5	0.978	NEURON_DIFFERENTIATION	disup
787.5	0.983	NITROGEN_COMPOUND_BIOSYNTHETIC_PROCESS	disup
74.5	0.041	NITROGEN_COMPOUND_CATABOLIC_PROCESS	disup
557	0.692	NITROGEN_COMPOUND_METABOLIC_PROCESS	disup
1	0	NUCLEOBASENUCLEOSIDENUCLEOTIDE_AND_NUCLEIC_ACID_METABOLIC_PROCESS	disup
49	0.013	NUCLEOTIDE_EXCISION_REPAIR	disup
38	0.008	ONE_CARBON_COMPOUND_METABOLIC_PROCESS	disup
810	0.997	ORGAN_DEVELOPMENT	disup
262.5	0.247	ORGANIC_ACID_METABOLIC_PROCESS	disup
778	0.979	PHOSPHOINOSITIDE_MEDIATED_SIGNALING	disup
30	0.0035	POSITIVE_REGULATION_OF_ANGIOGENESIS	disup
31	0.004	POSITIVE_REGULATION_OF_BIOLOGICAL_PROCESS	disup
558.5	0.696	POSITIVE_REGULATION_OF_CELL_CYCLE	disup
200	0.1355	POSITIVE_REGULATION_OF_CELL_MIGRATION	disup
39	0.0085	POSITIVE_REGULATION_OF_MAPKKK_CASCADE	disup
696.5	0.898	POSITIVE_REGULATION_OF_SECRETION	disup
599.5	0.788	POTASSIUM_ION_TRANSPORT	disup
786.5	0.982	PROTEIN_FOLDING	disup
1	0	PROTEIN_RNA_COMPLEX_ASSEMBLY	disup
799.5	0.99	PROTEIN_TARGETING_TO_MEMBRANE	disup
117.5	0.0615	REGULATION_OF_ACTION_POTENTIAL	disup
695	0.907	REGULATION_OF_AXONOGENESIS	disup
480	0.5635	REGULATION_OF_BLOOD_PRESSURE	disup
740	0.94	REGULATION_OF_BODY_FLUID_LEVELS	disup
780.5	0.978	REGULATION_OF_CELL_DIFFERENTIATION	disup
1	0	REGULATION_OF_CELLULAR_METABOLIC_PROCESS	disup
42.5	0.0095	REGULATION_OF_CHROMOSOME_ORGANIZATION_AND_BIOGENESIS	disup
31	0.004	REGULATION_OF_CYCLIN_DEPENDENT_PROTEIN_KINASE_ACTIVITY	disup
785	0.98	REGULATION_OF_CYTOKINE_BIOSYNTHETIC_PROCESS	disup
43	0.0095	REGULATION_OF_CYTOKINE_SECRETION	disup
1	0	REGULATION_OF_GENE_EXPRESSION	disup
10	0.0005	REGULATION_OF_GENE_EXPRESSION_EPIGENETIC	disup
475.5	0.579	REGULATION_OF_HEART_CONTRACTION	disup
790	0.986	REGULATION_OF_INTERFERON_GAMMA_BIOSYNTHETIC_PROCESS	disup
37	0.0085	REGULATION_OF_LIPID_METABOLIC_PROCESS	disup
1	0	REGULATION_OF_METABOLIC_PROCESS	disup
431.5	0.51	REGULATION_OF_MULTICELLULAR_ORGANISMAL_PROCESS	disup
746.5	0.949	REGULATION_OF_NEUROGENESIS	disup
1	0	REGULATION_OF_NUCLEOBASENUCLEOSIDENUCLEOTIDE_AND_NUCLEIC_ACID_METABOLIC_PROCESS	disup
10	0.0005	REGULATION_OF_RNA_METABOLIC_PROCESS	disup
1	0	REGULATION_OF_TRANSCRIPTION	disup
19	0.001	REGULATION_OF_TRANSCRIPTION_FROM_RNA_POLYMERASE_II_PROMOTER	disup
1	0	REGULATION_OF_TRANSCRIPTIONDNA_DEPENDENT	disup
811	0.999	RESPONSE_TO_BACTERIUM	disup
804	0.993	RESPONSE_TO_BIOTIC_STIMULUS	disup
812.5	0.999	RESPONSE_TO_EXTERNAL_STIMULUS	disup
812.5	0.999	RESPONSE_TO_WOUNDING	disup
311	0.3095	RHYTHMIC_PROCESS	disup
1	0	RIBONUCLEOPROTEIN_COMPLEX_BIOGENESIS_AND_ASSEMBLY	disup
30	0.0035	RIBOSOME_BIOGENESIS_AND_ASSEMBLY	disup
24	0.0035	RNA_3END_PROCESSING	disup
1	0	RNA_BIOSYNTHETIC_PROCESS	disup
1	0	RNA_METABOLIC_PROCESS	disup
1	0	RNA_PROCESSING	disup
1	0	RNA_SPLICING	disup
10	0.0005	RNA_SPLICINGVIA_TRANSESTERIFICATION_REACTIONS	disup
37	0.007	RRNA_METABOLIC_PROCESS	disup
796.5	0.992	SENSORY_ORGAN_DEVELOPMENT	disup
817.5	1	SKELETAL_DEVELOPMENT	disup
795.5	0.988	SKELETAL_MUSCLE_DEVELOPMENT	disup
109.5	0.055	SPHINGOID_METABOLIC_PROCESS	disup
76.5	0.033196	SPINDLE_ORGANIZATION_AND_BIOGENESIS	disup
776	0.976	STRIATED_MUSCLE_DEVELOPMENT	disup
775.5	0.975	SYNAPSE_ORGANIZATION_AND_BIOGENESIS	disup
813	0.999	SYNAPTIC_TRANSMISSION	disup
812.5	0.999	SYSTEM_DEVELOPMENT	disup
801.5	0.992	SYSTEM_PROCESS	disup
772	0.972	TISSUE_DEVELOPMENT	disup
794	0.991	TISSUE_MORPHOGENESIS	disup
1	0	TRANSCRIPTION	disup
1	0	TRANSCRIPTION_DNA_DEPENDENT	disup
10	0.0005	TRANSCRIPTION_FROM_RNA_POLYMERASE_II_PROMOTER	disup
1	0	TRANSLATION	disup
48	0.014	TRANSLATIONAL_INITIATION	disup
791.5	0.984	TRANSMISSION_OF_NERVE_IMPULSE	disup
363.5	0.403	VASCULATURE_DEVELOPMENT	disup
805.5	0.995	WOUND_HEALING	disup

## Sheet: mixdn
rank	p_value	GS	p_class
269	0.368	ACTIN_CYTOSKELETON_ORGANIZATION_AND_BIOGENESIS	mixdn
150	0.171	ACTIN_FILAMENT_BASED_PROCESS	mixdn
43	0.038	AGING	mixdn
32	0.028	AMINE_BIOSYNTHETIC_PROCESS	mixdn
111	0.125	AMINE_CATABOLIC_PROCESS	mixdn
28	0.024	AMINE_METABOLIC_PROCESS	mixdn
13	0.011	AMINO_ACID_AND_DERIVATIVE_METABOLIC_PROCESS	mixdn
154	0.17	AMINO_ACID_CATABOLIC_PROCESS	mixdn
92	0.089	AMINO_ACID_DERIVATIVE_METABOLIC_PROCESS	mixdn
8	0.005	AMINO_ACID_METABOLIC_PROCESS	mixdn
553	0.736	AMINO_ACID_TRANSPORT	mixdn
14	0.012	ANATOMICAL_STRUCTURE_DEVELOPMENT	mixdn
191	0.246	ANATOMICAL_STRUCTURE_FORMATION	mixdn
218	0.294	ANGIOGENESIS	mixdn
50	0.046	AROMATIC_COMPOUND_METABOLIC_PROCESS	mixdn
10	0.006	BEHAVIOR	mixdn
759	0.959	BIOPOLYMER_METABOLIC_PROCESS	mixdn
2	0.001	BLOOD_COAGULATION	mixdn
41	0.033	CARBOXYLIC_ACID_METABOLIC_PROCESS	mixdn
67	0.058	CATION_TRANSPORT	mixdn
22	0.019	CELL_CELL_SIGNALING	mixdn
47	0.04	CELL_SUBSTRATE_ADHESION	mixdn
718	0.929	CELLULAR_COMPONENT_ASSEMBLY	mixdn
80	0.072	CELLULAR_LIPID_CATABOLIC_PROCESS	mixdn
215	0.297	CENTRAL_NERVOUS_SYSTEM_DEVELOPMENT	mixdn
2	0.001	COAGULATION	mixdn
435	0.583	CYTOKINE_BIOSYNTHETIC_PROCESS	mixdn
413	0.549	CYTOKINE_METABOLIC_PROCESS	mixdn
702	0.911	CYTOKINE_SECRETION	mixdn
310	0.431	CYTOSKELETON_ORGANIZATION_AND_BIOGENESIS	mixdn
30	0.025	DEFENSE_RESPONSE_TO_BACTERIUM	mixdn
25	0.023	DIGESTION	mixdn
8	0.005	ECTODERM_DEVELOPMENT	mixdn
365	0.496	EMBRYONIC_DEVELOPMENT	mixdn
5	0.002	EPIDERMIS_DEVELOPMENT	mixdn
655	0.845	ESTABLISHMENT_AND_OR_MAINTENANCE_OF_CHROMATIN_ARCHITECTURE	mixdn
13	0.011	EXTRACELLULAR_STRUCTURE_ORGANIZATION_AND_BIOGENESIS	mixdn
444	0.585	FATTY_ACID_BETA_OXIDATION	mixdn
384	0.515	FATTY_ACID_METABOLIC_PROCESS	mixdn
260	0.357	FATTY_ACID_OXIDATION	mixdn
308	0.425	FEMALE_GAMETE_GENERATION	mixdn
45	0.036	FEMALE_PREGNANCY	mixdn
804	0.987	G2_M_TRANSITION_OF_MITOTIC_CELL_CYCLE	mixdn
33	0.028	GENERATION_OF_NEURONS	mixdn
260	0.359	GLYCOPROTEIN_CATABOLIC_PROCESS	mixdn
63	0.056	HEART_DEVELOPMENT	mixdn
12	0.008	HEMOSTASIS	mixdn
540	0.712	HETEROPHILIC_CELL_ADHESION	mixdn
45	0.044	HORMONE_SECRETION	mixdn
72	0.064	ION_TRANSPORT	mixdn
33	0.03	LEUKOCYTE_CHEMOTAXIS	mixdn
80	0.072	LIPID_CATABOLIC_PROCESS	mixdn
273	0.373	LIPID_HOMEOSTASIS	mixdn
742	0.947	MACROMOLECULAR_COMPLEX_ASSEMBLY	mixdn
613	0.8	MACROMOLECULE_BIOSYNTHETIC_PROCESS	mixdn
98	0.094	MEIOTIC_CELL_CYCLE	mixdn
79	0.073	METAL_ION_TRANSPORT	mixdn
801	0.992	MICROTUBULE_CYTOSKELETON_ORGANIZATION_AND_BIOGENESIS	mixdn
801	0.985	MITOTIC_SPINDLE_ORGANIZATION_AND_BIOGENESIS	mixdn
232	0.318	MONOCARBOXYLIC_ACID_METABOLIC_PROCESS	mixdn
153	0.169	MONOVALENT_INORGANIC_CATION_TRANSPORT	mixdn
407	0.549	MRNA_METABOLIC_PROCESS	mixdn
369	0.507	MRNA_PROCESSING_GO_0006397	mixdn
17	0.016	MULTICELLULAR_ORGANISMAL_DEVELOPMENT	mixdn
118	0.123	MUSCLE_DEVELOPMENT	mixdn
50	0.043	MYELOID_LEUKOCYTE_DIFFERENTIATION	mixdn
132	0.145	NEGATIVE_REGULATION_OF_ANGIOGENESIS	mixdn
43	0.035	NEGATIVE_REGULATION_OF_BIOLOGICAL_PROCESS	mixdn
356	0.473	NEGATIVE_REGULATION_OF_CELL_DIFFERENTIATION	mixdn
36	0.03	NEGATIVE_REGULATION_OF_CELL_MIGRATION	mixdn
16	0.015	NEGATIVE_REGULATION_OF_IMMUNE_SYSTEM_PROCESS	mixdn
150	0.163	NEGATIVE_REGULATION_OF_METABOLIC_PROCESS	mixdn
38	0.033	NEGATIVE_REGULATION_OF_MULTICELLULAR_ORGANISMAL_PROCESS	mixdn
197	0.268	NEGATIVE_REGULATION_OF_NUCLEOBASENUCLEOSIDENUCLEOTIDE_AND_NUCLEIC_ACID_METABOLIC_PROCESS	mixdn
35	0.029	NEGATIVE_REGULATION_OF_PHOSPHATE_METABOLIC_PROCESS	mixdn
25	0.021	NEGATIVE_REGULATION_OF_PHOSPHORYLATION	mixdn
494	0.661	NEGATIVE_REGULATION_OF_SECRETION	mixdn
252	0.349	NERVOUS_SYSTEM_DEVELOPMENT	mixdn
190	0.246	NEUROLOGICAL_SYSTEM_PROCESS	mixdn
72	0.065	NEURON_DEVELOPMENT	mixdn
63	0.054	NEURON_DIFFERENTIATION	mixdn
113	0.12	NITROGEN_COMPOUND_BIOSYNTHETIC_PROCESS	mixdn
111	0.125	NITROGEN_COMPOUND_CATABOLIC_PROCESS	mixdn
43	0.038	NITROGEN_COMPOUND_METABOLIC_PROCESS	mixdn
801	0.992	NUCLEOBASENUCLEOSIDENUCLEOTIDE_AND_NUCLEIC_ACID_METABOLIC_PROCESS	mixdn
622	0.812	NUCLEOTIDE_EXCISION_REPAIR	mixdn
537	0.709	ONE_CARBON_COMPOUND_METABOLIC_PROCESS	mixdn
26	0.023	ORGAN_DEVELOPMENT	mixdn
41	0.033	ORGANIC_ACID_METABOLIC_PROCESS	mixdn
45	0.036	PHOSPHOINOSITIDE_MEDIATED_SIGNALING	mixdn
756	0.945	POSITIVE_REGULATION_OF_ANGIOGENESIS	mixdn
718	0.928	POSITIVE_REGULATION_OF_BIOLOGICAL_PROCESS	mixdn
35	0.03	POSITIVE_REGULATION_OF_CELL_CYCLE	mixdn
783	0.974	POSITIVE_REGULATION_OF_CELL_MIGRATION	mixdn
789	0.979	POSITIVE_REGULATION_OF_MAPKKK_CASCADE	mixdn
43	0.036	POSITIVE_REGULATION_OF_SECRETION	mixdn
167	0.196	POTASSIUM_ION_TRANSPORT	mixdn
269	0.368	PROTEIN_FOLDING	mixdn
728	0.936	PROTEIN_RNA_COMPLEX_ASSEMBLY	mixdn
255	0.353	PROTEIN_TARGETING_TO_MEMBRANE	mixdn
708	0.923	REGULATION_OF_ACTION_POTENTIAL	mixdn
43	0.043	REGULATION_OF_AXONOGENESIS	mixdn
31	0.027	REGULATION_OF_BLOOD_PRESSURE	mixdn
22	0.021	REGULATION_OF_BODY_FLUID_LEVELS	mixdn
134	0.146	REGULATION_OF_CELL_DIFFERENTIATION	mixdn
595	0.778	REGULATION_OF_CELLULAR_METABOLIC_PROCESS	mixdn
556	0.74	REGULATION_OF_CHROMOSOME_ORGANIZATION_AND_BIOGENESIS	mixdn
762	0.967	REGULATION_OF_CYCLIN_DEPENDENT_PROTEIN_KINASE_ACTIVITY	mixdn
512	0.68	REGULATION_OF_CYTOKINE_BIOSYNTHETIC_PROCESS	mixdn
702	0.911	REGULATION_OF_CYTOKINE_SECRETION	mixdn
754	0.957	REGULATION_OF_GENE_EXPRESSION	mixdn
672	0.881	REGULATION_OF_GENE_EXPRESSION_EPIGENETIC	mixdn
615	0.806	REGULATION_OF_HEART_CONTRACTION	mixdn
109	0.111	REGULATION_OF_INTERFERON_GAMMA_BIOSYNTHETIC_PROCESS	mixdn
537	0.707	REGULATION_OF_LIPID_METABOLIC_PROCESS	mixdn
587	0.767	REGULATION_OF_METABOLIC_PROCESS	mixdn
532	0.696	REGULATION_OF_MULTICELLULAR_ORGANISMAL_PROCESS	mixdn
22	0.02	REGULATION_OF_NEUROGENESIS	mixdn
563	0.745	REGULATION_OF_NUCLEOBASENUCLEOSIDENUCLEOTIDE_AND_NUCLEIC_ACID_METABOLIC_PROCESS	mixdn
484	0.647	REGULATION_OF_RNA_METABOLIC_PROCESS	mixdn
619	0.807	REGULATION_OF_TRANSCRIPTION	mixdn
257	0.354	REGULATION_OF_TRANSCRIPTION_FROM_RNA_POLYMERASE_II_PROMOTER	mixdn
512	0.685	REGULATION_OF_TRANSCRIPTIONDNA_DEPENDENT	mixdn
48	0.048	RESPONSE_TO_BACTERIUM	mixdn
70	0.061	RESPONSE_TO_BIOTIC_STIMULUS	mixdn
2	0.001	RESPONSE_TO_EXTERNAL_STIMULUS	mixdn
6	0.004	RESPONSE_TO_WOUNDING	mixdn
274	0.384	RHYTHMIC_PROCESS	mixdn
815	0.997	RIBONUCLEOPROTEIN_COMPLEX_BIOGENESIS_AND_ASSEMBLY	mixdn
816	0.997	RIBOSOME_BIOGENESIS_AND_ASSEMBLY	mixdn
420	0.559	RNA_3END_PROCESSING	mixdn
676	0.892	RNA_BIOSYNTHETIC_PROCESS	mixdn
789	0.982	RNA_METABOLIC_PROCESS	mixdn
804	0.988	RNA_PROCESSING	mixdn
748	0.949	RNA_SPLICING	mixdn
680	0.888	RNA_SPLICINGVIA_TRANSESTERIFICATION_REACTIONS	mixdn
820	0.999	RRNA_METABOLIC_PROCESS	mixdn
276	0.378	SENSORY_ORGAN_DEVELOPMENT	mixdn
4	0.001	SKELETAL_DEVELOPMENT	mixdn
25	0.023	SKELETAL_MUSCLE_DEVELOPMENT	mixdn
577	0.761	SPHINGOID_METABOLIC_PROCESS	mixdn
801	0.985	SPINDLE_ORGANIZATION_AND_BIOGENESIS	mixdn
98	0.092	STRIATED_MUSCLE_DEVELOPMENT	mixdn
23	0.022	SYNAPSE_ORGANIZATION_AND_BIOGENESIS	mixdn
14	0.014	SYNAPTIC_TRANSMISSION	mixdn
25	0.023	SYSTEM_DEVELOPMENT	mixdn
89	0.085	SYSTEM_PROCESS	mixdn
54	0.045	TISSUE_DEVELOPMENT	mixdn
18	0.014	TISSUE_MORPHOGENESIS	mixdn
707	0.926	TRANSCRIPTION	mixdn
676	0.882	TRANSCRIPTION_DNA_DEPENDENT	mixdn
660	0.874	TRANSCRIPTION_FROM_RNA_POLYMERASE_II_PROMOTER	mixdn
630	0.802	TRANSLATION	mixdn
743	0.948	TRANSLATIONAL_INITIATION	mixdn
63	0.054	TRANSMISSION_OF_NERVE_IMPULSE	mixdn
283	0.394	VASCULATURE_DEVELOPMENT	mixdn
1	0	WOUND_HEALING	mixdn

## Sheet: nondir
rank	p_value	GS	p_class
191.5	0.1445	ACTIN_CYTOSKELETON_ORGANIZATION_AND_BIOGENESIS	nondir
184.5	0.1385	ACTIN_FILAMENT_BASED_PROCESS	nondir
44	0.014	AGING	nondir
69.5	0.027	AMINE_BIOSYNTHETIC_PROCESS	nondir
33.5	0.007	AMINE_CATABOLIC_PROCESS	nondir
20	0.0025	AMINE_METABOLIC_PROCESS	nondir
1	0	AMINO_ACID_AND_DERIVATIVE_METABOLIC_PROCESS	nondir
46	0.0125	AMINO_ACID_CATABOLIC_PROCESS	nondir
25.5	0.004	AMINO_ACID_DERIVATIVE_METABOLIC_PROCESS	nondir
11	0.001	AMINO_ACID_METABOLIC_PROCESS	nondir
150	0.0995	AMINO_ACID_TRANSPORT	nondir
1	0	ANATOMICAL_STRUCTURE_DEVELOPMENT	nondir
55	0.0145	ANATOMICAL_STRUCTURE_FORMATION	nondir
68	0.0235	ANGIOGENESIS	nondir
347.5	0.3725	AROMATIC_COMPOUND_METABOLIC_PROCESS	nondir
21	0.003	BEHAVIOR	nondir
750	0.933	BIOPOLYMER_METABOLIC_PROCESS	nondir
24.5	0.0035	BLOOD_COAGULATION	nondir
1	0	CARBOXYLIC_ACID_METABOLIC_PROCESS	nondir
16	0.001	CATION_TRANSPORT	nondir
24	0.0045	CELL_CELL_SIGNALING	nondir
48	0.014	CELL_SUBSTRATE_ADHESION	nondir
582.5	0.7245	CELLULAR_COMPONENT_ASSEMBLY	nondir
36	0.0065	CELLULAR_LIPID_CATABOLIC_PROCESS	nondir
205	0.1695	CENTRAL_NERVOUS_SYSTEM_DEVELOPMENT	nondir
24.5	0.0035	COAGULATION	nondir
497.5	0.598	CYTOKINE_BIOSYNTHETIC_PROCESS	nondir
487	0.572	CYTOKINE_METABOLIC_PROCESS	nondir
65.5	0.0215	CYTOKINE_SECRETION	nondir
243	0.222	CYTOSKELETON_ORGANIZATION_AND_BIOGENESIS	nondir
72.5	0.0255	DEFENSE_RESPONSE_TO_BACTERIUM	nondir
59.5	0.018	DIGESTION	nondir
32	0.007	ECTODERM_DEVELOPMENT	nondir
90	0.0385	EMBRYONIC_DEVELOPMENT	nondir
14.5	0.001	EPIDERMIS_DEVELOPMENT	nondir
674.5	0.84	ESTABLISHMENT_AND_OR_MAINTENANCE_OF_CHROMATIN_ARCHITECTURE	nondir
111	0.066	EXTRACELLULAR_STRUCTURE_ORGANIZATION_AND_BIOGENESIS	nondir
56	0.0175	FATTY_ACID_BETA_OXIDATION	nondir
58.5	0.0235	FATTY_ACID_METABOLIC_PROCESS	nondir
29	0.005	FATTY_ACID_OXIDATION	nondir
380.5	0.4135	FEMALE_GAMETE_GENERATION	nondir
236	0.205	FEMALE_PREGNANCY	nondir
377	0.4065	G2_M_TRANSITION_OF_MITOTIC_CELL_CYCLE	nondir
100.5	0.0545	GENERATION_OF_NEURONS	nondir
62	0.0245	GLYCOPROTEIN_CATABOLIC_PROCESS	nondir
7	0.0005	HEART_DEVELOPMENT	nondir
43	0.009	HEMOSTASIS	nondir
164	0.114	HETEROPHILIC_CELL_ADHESION	nondir
247	0.222	HORMONE_SECRETION	nondir
14.5	0.001	ION_TRANSPORT	nondir
112.5	0.068	LEUKOCYTE_CHEMOTAXIS	nondir
22.5	0.0035	LIPID_CATABOLIC_PROCESS	nondir
43.5	0.0155	LIPID_HOMEOSTASIS	nondir
633	0.789	MACROMOLECULAR_COMPLEX_ASSEMBLY	nondir
759	0.941	MACROMOLECULE_BIOSYNTHETIC_PROCESS	nondir
46.5	0.0115	MEIOTIC_CELL_CYCLE	nondir
26	0.0045	METAL_ION_TRANSPORT	nondir
503	0.606	MICROTUBULE_CYTOSKELETON_ORGANIZATION_AND_BIOGENESIS	nondir
433.5	0.4985	MITOTIC_SPINDLE_ORGANIZATION_AND_BIOGENESIS	nondir
71.5	0.0255	MONOCARBOXYLIC_ACID_METABOLIC_PROCESS	nondir
31	0.004	MONOVALENT_INORGANIC_CATION_TRANSPORT	nondir
206.5	0.16	MRNA_METABOLIC_PROCESS	nondir
87.5	0.039	MRNA_PROCESSING_GO_0006397	nondir
1	0	MULTICELLULAR_ORGANISMAL_DEVELOPMENT	nondir
129	0.0845	MUSCLE_DEVELOPMENT	nondir
126	0.082	MYELOID_LEUKOCYTE_DIFFERENTIATION	nondir
276	0.262	NEGATIVE_REGULATION_OF_ANGIOGENESIS	nondir
86.5	0.0415	NEGATIVE_REGULATION_OF_BIOLOGICAL_PROCESS	nondir
237	0.206	NEGATIVE_REGULATION_OF_CELL_DIFFERENTIATION	nondir
139	0.093	NEGATIVE_REGULATION_OF_CELL_MIGRATION	nondir
48	0.0125	NEGATIVE_REGULATION_OF_IMMUNE_SYSTEM_PROCESS	nondir
324.5	0.337	NEGATIVE_REGULATION_OF_METABOLIC_PROCESS	nondir
39	0.0065	NEGATIVE_REGULATION_OF_MULTICELLULAR_ORGANISMAL_PROCESS	nondir
394.5	0.444	NEGATIVE_REGULATION_OF_NUCLEOBASENUCLEOSIDENUCLEOTIDE_AND_NUCLEIC_ACID_METABOLIC_PROCESS	nondir
40.5	0.0095	NEGATIVE_REGULATION_OF_PHOSPHATE_METABOLIC_PROCESS	nondir
37	0.0075	NEGATIVE_REGULATION_OF_PHOSPHORYLATION	nondir
187.5	0.142	NEGATIVE_REGULATION_OF_SECRETION	nondir
108.5	0.064	NERVOUS_SYSTEM_DEVELOPMENT	nondir
39	0.0075	NEUROLOGICAL_SYSTEM_PROCESS	nondir
210.5	0.1705	NEURON_DEVELOPMENT	nondir
108	0.0645	NEURON_DIFFERENTIATION	nondir
168	0.1185	NITROGEN_COMPOUND_BIOSYNTHETIC_PROCESS	nondir
16	0.002	NITROGEN_COMPOUND_CATABOLIC_PROCESS	nondir
17.5	0.0025	NITROGEN_COMPOUND_METABOLIC_PROCESS	nondir
746.5	0.926	NUCLEOBASENUCLEOSIDENUCLEOTIDE_AND_NUCLEIC_ACID_METABOLIC_PROCESS	nondir
606	0.755	NUCLEOTIDE_EXCISION_REPAIR	nondir
249.5	0.2235	ONE_CARBON_COMPOUND_METABOLIC_PROCESS	nondir
15.5	0.0015	ORGAN_DEVELOPMENT	nondir
4	0.0005	ORGANIC_ACID_METABOLIC_PROCESS	nondir
67	0.0235	PHOSPHOINOSITIDE_MEDIATED_SIGNALING	nondir
185.5	0.138	POSITIVE_REGULATION_OF_ANGIOGENESIS	nondir
684	0.8585	POSITIVE_REGULATION_OF_BIOLOGICAL_PROCESS	nondir
119	0.074	POSITIVE_REGULATION_OF_CELL_CYCLE	nondir
472.5	0.56	POSITIVE_REGULATION_OF_CELL_MIGRATION	nondir
483	0.58	POSITIVE_REGULATION_OF_MAPKKK_CASCADE	nondir
100.5	0.0535	POSITIVE_REGULATION_OF_SECRETION	nondir
39.5	0.0085	POTASSIUM_ION_TRANSPORT	nondir
457	0.5335	PROTEIN_FOLDING	nondir
517	0.6205	PROTEIN_RNA_COMPLEX_ASSEMBLY	nondir
311.5	0.3185	PROTEIN_TARGETING_TO_MEMBRANE	nondir
216.5	0.182	REGULATION_OF_ACTION_POTENTIAL	nondir
78	0.029	REGULATION_OF_AXONOGENESIS	nondir
43.5	0.011	REGULATION_OF_BLOOD_PRESSURE	nondir
34.5	0.0065	REGULATION_OF_BODY_FLUID_LEVELS	nondir
154	0.102	REGULATION_OF_CELL_DIFFERENTIATION	nondir
679	0.843	REGULATION_OF_CELLULAR_METABOLIC_PROCESS	nondir
417.5	0.475	REGULATION_OF_CHROMOSOME_ORGANIZATION_AND_BIOGENESIS	nondir
713.5	0.892	REGULATION_OF_CYCLIN_DEPENDENT_PROTEIN_KINASE_ACTIVITY	nondir
596	0.7385	REGULATION_OF_CYTOKINE_BIOSYNTHETIC_PROCESS	nondir
117	0.0725	REGULATION_OF_CYTOKINE_SECRETION	nondir
686	0.8535	REGULATION_OF_GENE_EXPRESSION	nondir
249.5	0.2235	REGULATION_OF_GENE_EXPRESSION_EPIGENETIC	nondir
249.5	0.228	REGULATION_OF_HEART_CONTRACTION	nondir
266	0.2455	REGULATION_OF_INTERFERON_GAMMA_BIOSYNTHETIC_PROCESS	nondir
156	0.104	REGULATION_OF_LIPID_METABOLIC_PROCESS	nondir
611.5	0.763	REGULATION_OF_METABOLIC_PROCESS	nondir
144.5	0.098	REGULATION_OF_MULTICELLULAR_ORGANISMAL_PROCESS	nondir
37	0.008	REGULATION_OF_NEUROGENESIS	nondir
661.5	0.8215	REGULATION_OF_NUCLEOBASENUCLEOSIDENUCLEOTIDE_AND_NUCLEIC_ACID_METABOLIC_PROCESS	nondir
599	0.743	REGULATION_OF_RNA_METABOLIC_PROCESS	nondir
606.5	0.754	REGULATION_OF_TRANSCRIPTION	nondir
426.5	0.484	REGULATION_OF_TRANSCRIPTION_FROM_RNA_POLYMERASE_II_PROMOTER	nondir
582	0.72	REGULATION_OF_TRANSCRIPTIONDNA_DEPENDENT	nondir
86	0.04	RESPONSE_TO_BACTERIUM	nondir
66.5	0.0245	RESPONSE_TO_BIOTIC_STIMULUS	nondir
17	0.002	RESPONSE_TO_EXTERNAL_STIMULUS	nondir
22	0.0025	RESPONSE_TO_WOUNDING	nondir
73.5	0.0285	RHYTHMIC_PROCESS	nondir
746.5	0.929	RIBONUCLEOPROTEIN_COMPLEX_BIOGENESIS_AND_ASSEMBLY	nondir
657	0.821	RIBOSOME_BIOGENESIS_AND_ASSEMBLY	nondir
74	0.035	RNA_3END_PROCESSING	nondir
766	0.95	RNA_BIOSYNTHETIC_PROCESS	nondir
689	0.87	RNA_METABOLIC_PROCESS	nondir
157	0.11	RNA_PROCESSING	nondir
186.5	0.149	RNA_SPLICING	nondir
617	0.768	RNA_SPLICINGVIA_TRANSESTERIFICATION_REACTIONS	nondir
756.5	0.937	RRNA_METABOLIC_PROCESS	nondir
485	0.5835	SENSORY_ORGAN_DEVELOPMENT	nondir
1	0	SKELETAL_DEVELOPMENT	nondir
108.5	0.0635	SKELETAL_MUSCLE_DEVELOPMENT	nondir
175.5	0.128	SPHINGOID_METABOLIC_PROCESS	nondir
433.5	0.4985	SPINDLE_ORGANIZATION_AND_BIOGENESIS	nondir
193	0.146	STRIATED_MUSCLE_DEVELOPMENT	nondir
176	0.1235	SYNAPSE_ORGANIZATION_AND_BIOGENESIS	nondir
18.5	0.002	SYNAPTIC_TRANSMISSION	nondir
1	0	SYSTEM_DEVELOPMENT	nondir
1	0	SYSTEM_PROCESS	nondir
57	0.018	TISSUE_DEVELOPMENT	nondir
57.5	0.017	TISSUE_MORPHOGENESIS	nondir
762	0.9435	TRANSCRIPTION	nondir
765	0.949	TRANSCRIPTION_DNA_DEPENDENT	nondir
757	0.9425	TRANSCRIPTION_FROM_RNA_POLYMERASE_II_PROMOTER	nondir
687.5	0.864	TRANSLATION	nondir
530	0.646	TRANSLATIONAL_INITIATION	nondir
8.5	0.001	TRANSMISSION_OF_NERVE_IMPULSE	nondir
70.5	0.0255	VASCULATURE_DEVELOPMENT	nondir
23	0.002	WOUND_HEALING	nondir
